# Supplementary material for: The fate of Venusian chlorine
Source: Research Square preprint supplement (doi:10.21203/rs.3.rs-7979013/v1), 2025-12-09
Supplement: Supplementary file 1 [file bf88f0ca07981a2f6b25ec99.pdf]

## Supplementary Information

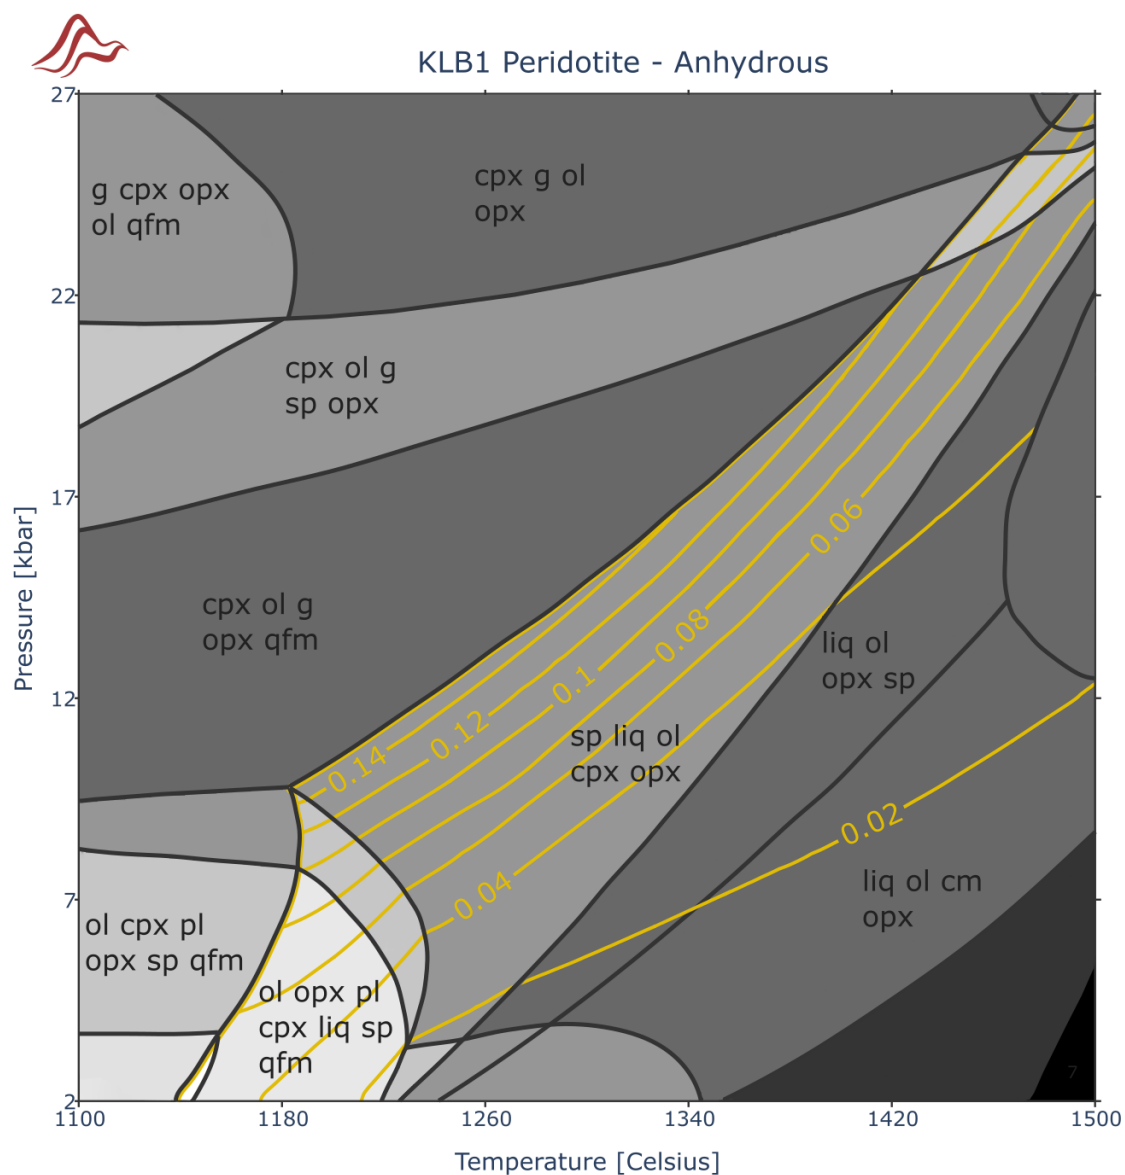

**Supplementary Figure 1.** Pseudosection of KLB-1 mantle peridotite. Yellow lines are isopleths of  $\text{NaSi}_{1/2}$ , which together define the range in P-T conditions of alkaline partial melting. Mineral phase fields include clinopyroxene (cpx), feldspar (fsp), garnet (g), liquid melt (liq), olivine (ol), orthopyroxene (opx), spinel (spn). Diagram constructed using MAgEMinApp and the alkaline melting relations of Weller et al. (2024)<sup>71</sup>.

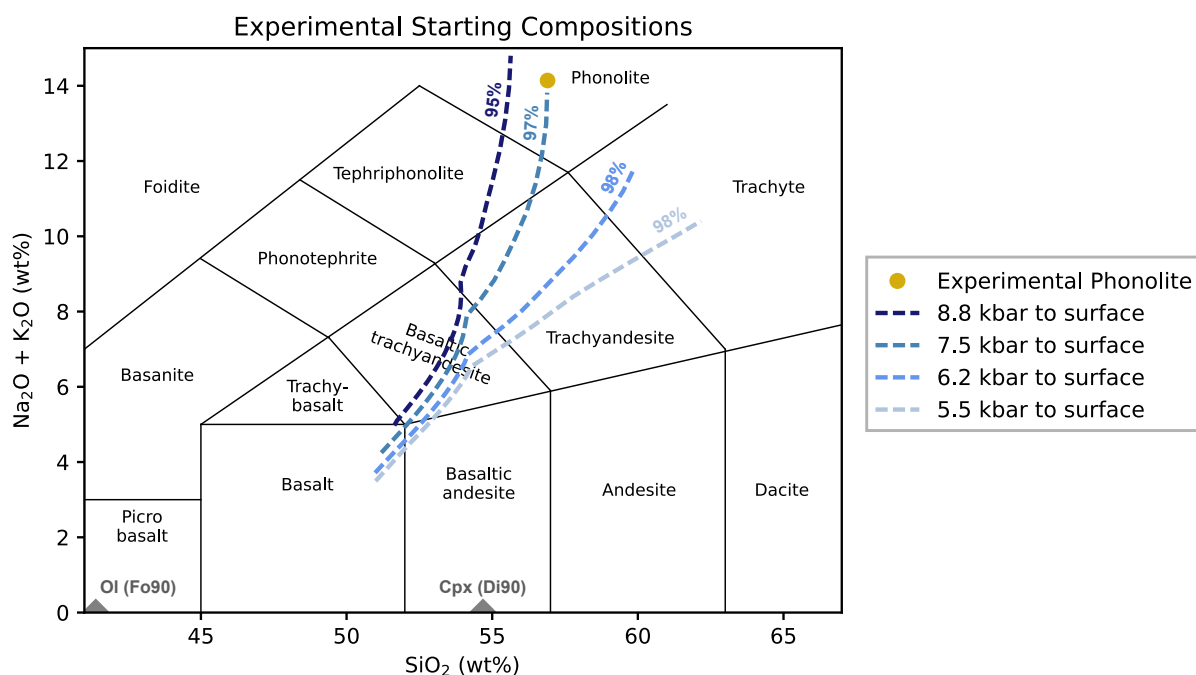

**Supplementary Figure 2.** Total alkali silica (TAS) diagram showing the fractionation paths (95 to 98%) of partial melts derived from varying degrees of adiabatic decompression melting of a KLB-1-like Venusian mantle source. The phonolitic experimental starting composition used in this study is indicated by the yellow spot. Fractionation paths demonstrate the generation of alkaline and evolved siliceous melts under low-degree partial melting and progressive differentiation. Cpx (Di90) is clinopyroxene with 0.9 Mg/(Mg + Fe), and Ol (Fo90) is olivine with 0.9 Mg/(Mg + Fe).

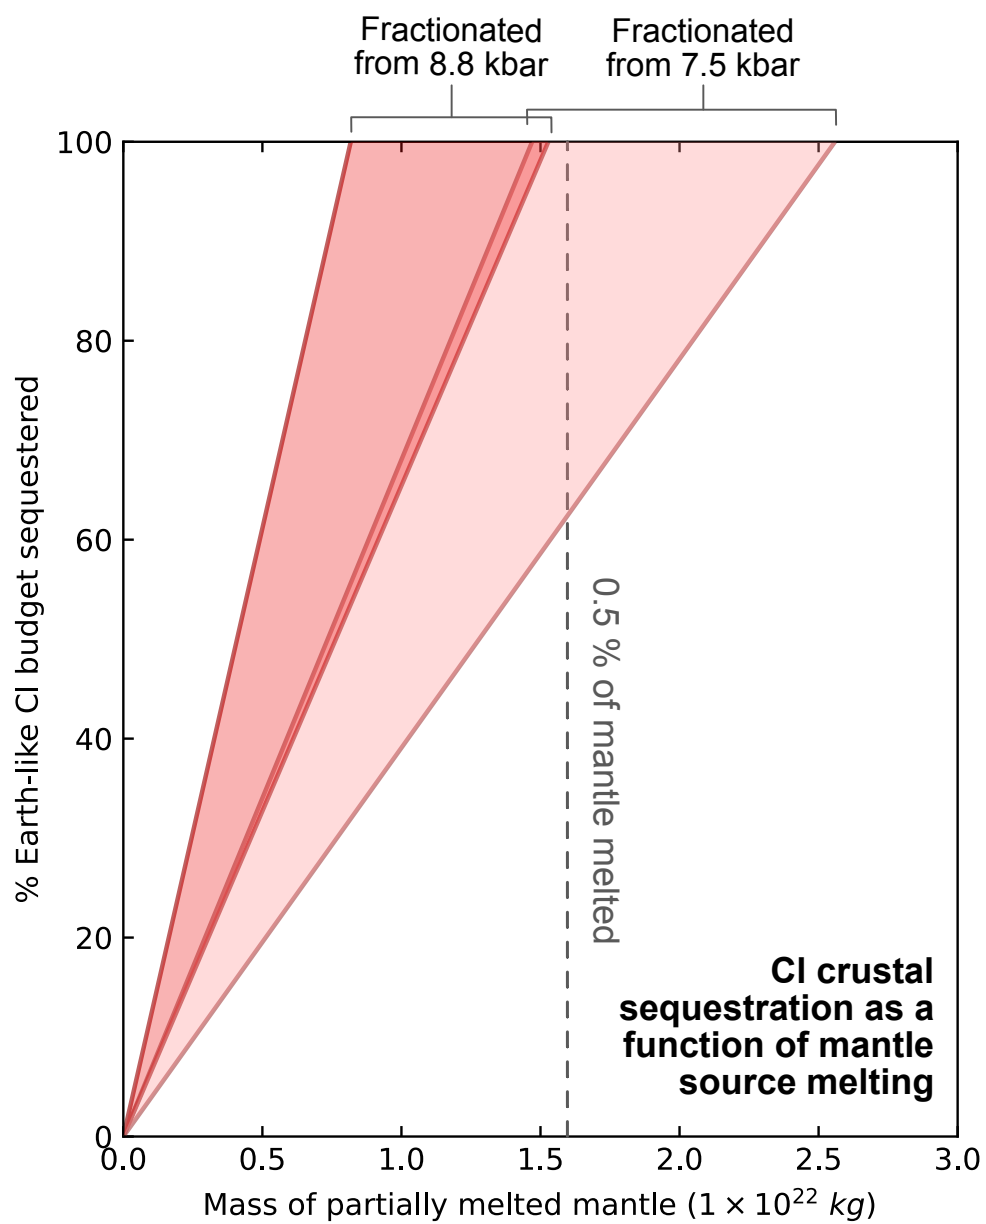

**Supplementary Figure 3.** Degree of NaCl sequestration in the Venusian crust by mass of mantle source melt.

**Supplementary Table 1.** Starting compositions and CIPW norms.

| Bulk Composition (wt%)         |                        |
|--------------------------------|------------------------|
| Oxide                          | Phonolite <sup>a</sup> |
| SiO <sub>2</sub>               | 57.63                  |
| TiO <sub>2</sub>               | 0.6                    |
| Al <sub>2</sub> O <sub>3</sub> | 20.43                  |
| FeO                            | 4.16                   |
| MnO                            | 0.19                   |
| MgO                            | 0.59                   |
| CaO                            | 1.91                   |
| Na <sub>2</sub> O              | 8.83                   |
| K <sub>2</sub> O               | 5.49                   |
| SO <sub>3</sub>                | 0                      |
| P <sub>2</sub> O <sub>5</sub>  | 0.17                   |
| CIPW Norm (wt%)                |                        |
| Mineral                        | Phonolite <sup>a</sup> |
| Acmite                         | 0.22                   |
| Diopside                       | 7.18                   |
| Albite                         | 32.60                  |
| Orthoclase                     | 32.44                  |
| Olivine                        | 2.78                   |
| Nepheline                      | 22.68                  |
| Apatite                        | 0.39                   |
| Ilmenite                       | 1.14                   |
| Magnetite                      | 0.56                   |

<sup>a</sup>Modified from Carmichael et al. (1974)<sup>78</sup>.

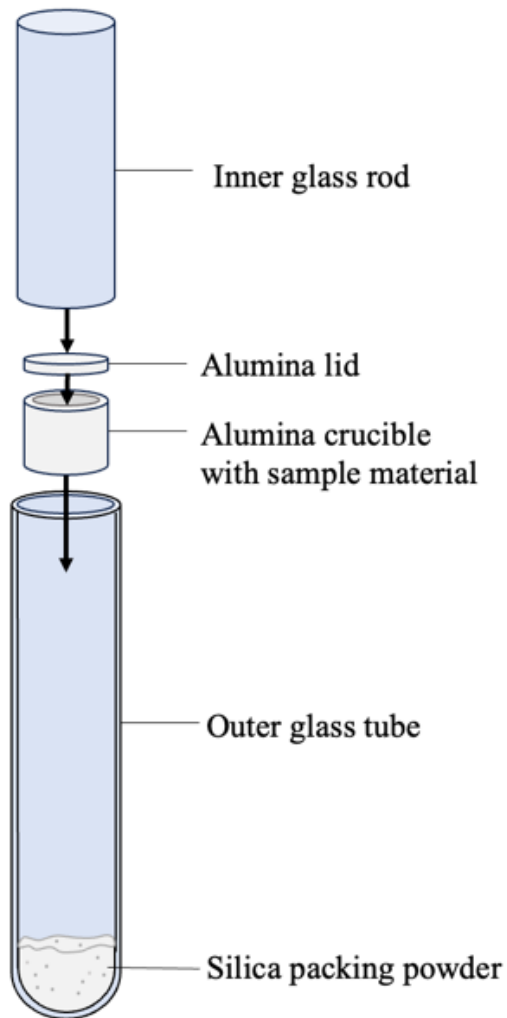

**Supplementary Figure 4.** Vacuum-sealed experimental assembly.

## References

71. Weller, O. M. *et al.* New Thermodynamic Models for Anhydrous Alkaline-Silicate Magmatic Systems. *J. Petrol.* **65**, egae098 (2024).
78. Carmichael, I. S. E., Turner, F. J. & Verhoogen, J. *Igneous Petrology*. (McGraw-Hill, New York, 1974).
